# Supplementary material for: A novel ultra-thin catalyst layer based on wheat ear-like catalysts for polymer electrolyte membrane fuel cells
Source: Royal Society of Chemistry journal article supplement (doi:10.1039/c4ra09759a), 2014-01-01
Supplement: c4ra09759a1.pdf [file c4ra09759a1.pdf]

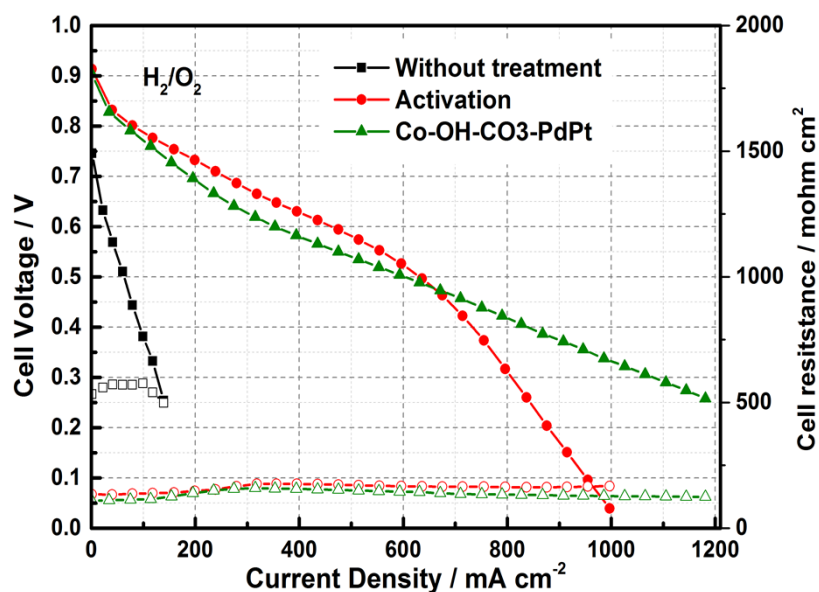

Figure S1 I-V curves of the fuel cell with different treatments (Without treatment: the fuel cell based on the Co-OH-CO<sub>3</sub>-PdPt electrode without acid leaching; Activation: the "without treatment" cell activated at low current density for 24h and then N<sub>2</sub> purge; Co-OH-CO<sub>3</sub>-PdPt: the fuel cell based on the Co-OH-CO<sub>3</sub>-PdPt electrode with acid leaching)

(Testing condition: active area 1 cm<sup>2</sup>; 65°C; gas flow rate of H<sub>2</sub>/O<sub>2</sub> was 15/70 sccm min<sup>-1</sup>; H<sub>2</sub>/O<sub>2</sub> gases were externally humidified at dew point temperature of 65°C, respectively. Pt and Pd loading are 43 and 24 µg cm<sup>-2</sup>).

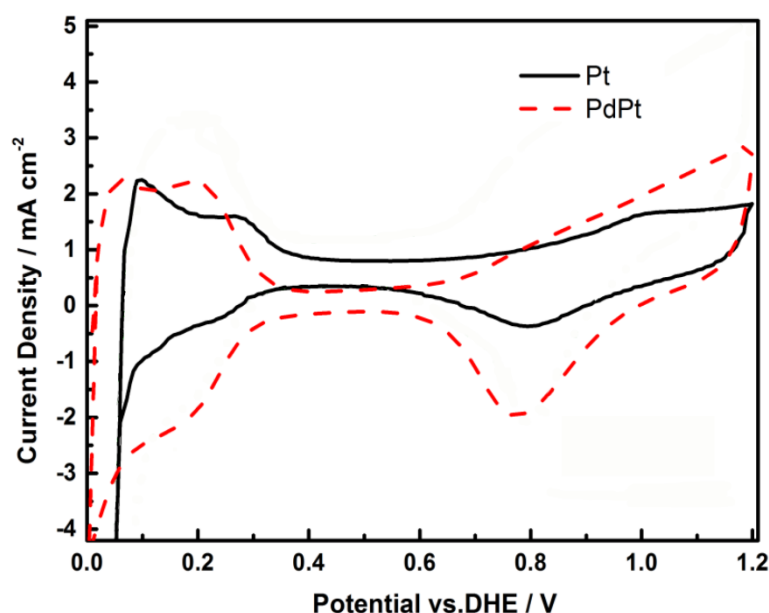

Figure S2 the CV curves of the UTCL based on Co-OH-CO<sub>3</sub>-Pt and Co-OH-CO<sub>3</sub>-PdPt electrodes.

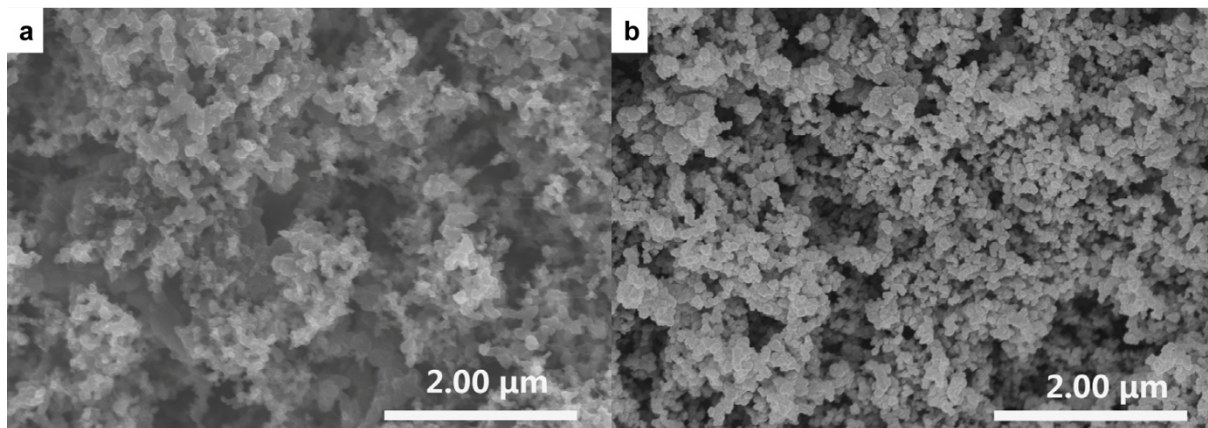

Figure S3 SEM images of the GDL (a) and GDL-Pt (b).

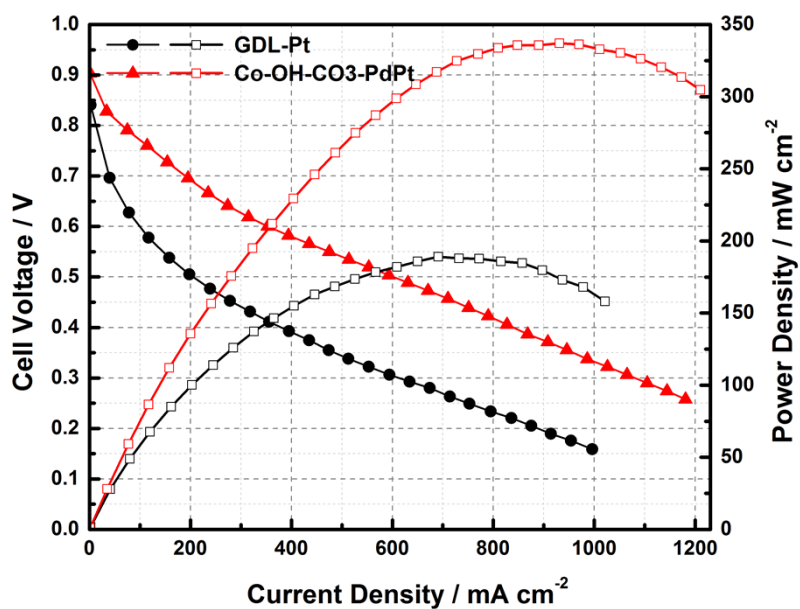

Figure S4 I-V curves of the catalyst layer based on Co-OH-CO<sub>3</sub>-PdPt and GDL-Pt electrodes.
